# Supplementary material for: Metal ions and solvents ratio co-regulate four new magnetic coordination polymers based upon an unsymmetric tricarboxylate acid ligand
Source: Royal Society of Chemistry journal article supplement (doi:10.1039/c4dt00995a), 2014-01-01
Supplement: c4dt00995a1.pdf [file c4dt00995a1.pdf]

Supplementary Information

**Metal ions and solvents ratio co-regulate four new magnetic coordination polymers based upon unsymmetric tricarboxylate acid ligand**

Yuan-Pu Li, Ying Chai, Guo-Ping Yang, Hui-Hui Miao, Lin Cui, Yao-Yu Wang\* and Qi-Zhen

Shi

Table S1 Crystal and structure refinement data for 1–4

| Compound                                 | 1                                                                               | 2                                                                              | 3                                                               | 4                                                                               |
|------------------------------------------|---------------------------------------------------------------------------------|--------------------------------------------------------------------------------|-----------------------------------------------------------------|---------------------------------------------------------------------------------|
| empirical formula                        | C <sub>70</sub> H <sub>54</sub> Co <sub>3</sub> O <sub>16</sub> N <sub>12</sub> | C <sub>54</sub> H <sub>50</sub> Mn <sub>3</sub> N <sub>8</sub> O <sub>20</sub> | C <sub>27</sub> H <sub>24</sub> NiN <sub>4</sub> O <sub>9</sub> | C <sub>78</sub> H <sub>74</sub> Ni <sub>3</sub> N <sub>16</sub> O <sub>34</sub> |
| formula mass                             | 1494.06                                                                         | 1295.84                                                                        | 607.21                                                          | 1955.66                                                                         |
| Crystal system                           | Triclinic                                                                       | Triclinic                                                                      | Orthorhombic                                                    | Monoclinic                                                                      |
| Space group                              | <i>P</i> $\bar{1}$                                                              | <i>P</i> $\bar{1}$                                                             | <i>P</i> 2 <sub>1</sub> 2 <sub>1</sub> 2 <sub>1</sub>           | <i>P</i> 2 <sub>1</sub> / <i>c</i>                                              |
| a (Å)                                    | 10.193(4)                                                                       | 10.125(8)                                                                      | 11.6286(16)                                                     | 13.683(2)                                                                       |
| b (Å)                                    | 13.722(5)                                                                       | 10.7664(9)                                                                     | 13.6585(18)                                                     | 23.839(4)                                                                       |
| c (Å)                                    | 14.606(6)                                                                       | 13.2928(12)                                                                    | 15.944(2)                                                       | 14.576(2)                                                                       |
| $\alpha$ (°)                             | 107.685(6)                                                                      | 86.521(10)                                                                     | 90                                                              | 90                                                                              |
| $\beta$ (°)                              | 102.170(7)                                                                      | 73.151(2)                                                                      | 90                                                              | 90.745(4)                                                                       |
| $\gamma$ (°)                             | 111.188(6)                                                                      | 85.317(10)                                                                     | 90                                                              | 90                                                                              |
| V (Å <sup>3</sup> )                      | 1692.5(11)                                                                      | 1381.2(2)                                                                      | 2532.4(6)                                                       | 4685.8(12)                                                                      |
| Z                                        | 1                                                                               | 1                                                                              | 4                                                               | 2                                                                               |
| D <sub>calcd</sub> (mg/cm <sup>3</sup> ) | 1.468                                                                           | 1.558                                                                          | 1.593                                                           | 1.386                                                                           |
| $\mu$ (mm <sup>-1</sup> )                | 0.805                                                                           | 0.762                                                                          | 0.832                                                           | 0.686                                                                           |
| F(000)                                   | 767                                                                             | 665                                                                            | 1256                                                            | 2020                                                                            |
| $\Theta$ (°)                             | 25.10                                                                           | 26.24                                                                          | 26.27                                                           | 25.10                                                                           |
| GOF                                      | 1.044                                                                           | 1.012                                                                          | 1.009                                                           | 1.153                                                                           |
| R1 <sup>a</sup>                          | 0.0745                                                                          | 0.0514                                                                         | 0.0533                                                          | 0.0890                                                                          |
| wR2 <sup>b</sup>                         | 0.2073                                                                          | 0.1315                                                                         | 0.1086                                                          | 0.2193                                                                          |

<sup>a</sup>  $R_1 = \sum ||F_o| - |F_c|| / \sum |F_o|$ .    <sup>b</sup>  $wR_2 = \{ \sum [w(F_o^2 - F_c^2)^2] / \sum (F_o^2)^2 \}^{1/2}$

## Supplementary Information

**Table S2 Selected bond lengths (Å) and bond angles (°) for CPs 1-4.**

| <b>Compound 1</b>   |            |                     |            |
|---------------------|------------|---------------------|------------|
| Co(1)-O(6)          | 2.094(5)   | N(4)-Co(2)-N(1)     | 177.7(2)   |
| Co(1)-O(6)#1        | 2.094(5)   | O(1)-Co(2)-O(4)#3   | 93.85(17)  |
| Co(1)-O(7)          | 2.119(6)   | O(2)#2-Co(2)-O(4)#3 | 153.21(18) |
| Co(1)-O(7)#1        | 2.119(6)   | N(4)-Co(2)-O(4)#3   | 89.9(2)    |
| Co(1)-N(5)          | 2.149(5)   | N(1)-Co(2)-O(4)#3   | 90.20(19)  |
| Co(1)-N(5)#1        | 2.149(5)   | O(1)-Co(2)-O(3)#3   | 153.13(16) |
| Co(2)-O(1)          | 2.047(5)   | O(2)#2-Co(2)-O(3)#3 | 93.44(16)  |
| Co(2)-O(2)#2        | 2.070(4)   | N(4)-Co(2)-O(3)#3   | 95.4(2)    |
| Co(2)-N(4)          | 2.122(6)   | N(1)-Co(2)-O(3)#3   | 86.65(19)  |
| Co(2)-N(1)          | 2.148(5)   | O(4)#3-Co(2)-O(3)#3 | 59.92(16)  |
| Co(2)-O(4)#3        | 2.168(4)   | C(25)-N(1)-C(26)    | 106.4(5)   |
| Co(2)-O(3)#3        | 2.256(5)   | C(25)-N(1)-Co(2)    | 125.9(5)   |
| O(2)-Co(2)#2        | 2.070(4)   | C(26)-N(1)-Co(2)    | 127.4(4)   |
| O(3)-Co(2)#3        | 2.256(5)   | C(25)-N(2)-C(27)    | 108.3(5)   |
| O(4)-Co(2)#3        | 2.168(4)   | C(25)-N(2)-C(17)#6  | 126.1(6)   |
| O(6)-Co(1)-O(6)#1   | 180.000(1) | C(27)-N(2)-C(17)#6  | 125.5(6)   |
| O(6)-Co(1)-O(7)     | 86.4(2)    | C(23)-N(3)-C(22)    | 106.6(5)   |
| O(6)#1-Co(1)-O(7)   | 93.6(2)    | C(23)-N(3)-C(20)    | 128.8(6)   |
| O(6)-Co(1)-O(7)#1   | 93.6(2)    | C(22)-N(3)-C(20)    | 124.6(5)   |
| O(6)#1-Co(1)-O(7)#1 | 86.4(2)    | C(23)-N(4)-C(24)    | 104.3(5)   |
| O(7)-Co(1)-O(7)#1   | 180.000(1) | C(23)-N(4)-Co(2)    | 125.6(5)   |
| O(6)-Co(1)-N(5)     | 90.2(2)    | C(24)-N(4)-Co(2)    | 129.7(4)   |
| O(6)#1-Co(1)-N(5)   | 89.8(2)    | C(33)-N(5)-C(31)    | 107.4(5)   |
| O(7)-Co(1)-N(5)     | 89.6(2)    | C(33)-N(5)-Co(1)    | 129.5(5)   |
| O(7)#1-Co(1)-N(5)   | 90.4(3)    | C(31)-N(5)-Co(1)    | 122.9(4)   |
| O(6)-Co(1)-N(5)#1   | 89.8(2)    | C(33)-N(6)-C(32)    | 106.3(5)   |
| O(6)#1-Co(1)-N(5)#1 | 90.2(2)    | C(33)-N(6)-C(30)    | 125.8(6)   |
| O(7)-Co(1)-N(5)#1   | 90.4(3)    | C(32)-N(6)-C(30)    | 127.9(5)   |
| O(7)#1-Co(1)-N(5)#1 | 89.6(2)    | C(21)-O(1)-Co(2)    | 145.3(4)   |
| N(5)-Co(1)-N(5)#1   | 180.0(3)   | C(21)-O(2)-Co(2)#2  | 124.3(4)   |
| O(1)-Co(2)-O(2)#2   | 112.27(17) | C(13)-O(3)-Co(2)#3  | 87.1(4)    |
| O(1)-Co(2)-N(4)     | 89.8(2)    | C(13)-O(4)-Co(2)#3  | 91.4(3)    |
| O(2)#2-Co(2)-N(4)   | 95.8(2)    | C(14)-O(6)-Co(1)    | 131.1(5)   |
| O(1)-Co(2)-N(1)     | 87.87(19)  | C(34)-O(7)-Co(1)    | 128.3(6)   |
| <b>Compound 2</b>   |            |                     |            |
| Mn(1)-O(6)          | 2.0967     | O(8)-Mn(1)-O(3)#1   | 92.3       |
| Mn(1)-O(8)          | 2.1888(11) | N(1)-Mn(1)-O(3)#1   | 144.2      |
| Mn(1)-N(1)          | 2.1902     | O(7)-Mn(1)-O(3)#1   | 92.1       |
| Mn(1)-O(7)          | 2.2539(11) | O(4)#1-Mn(1)-O(3)#1 | 56.3       |
| Mn(1)-O(4)#1        | 2.2643     | O(2)#2-Mn(2)-O(2)   | 180        |
| Mn(1)-O(3)#1        | 2.3301     | O(2)#2-Mn(2)-N(3)   | 90.5       |

### Supplementary Information

|                   |            |                     |            |
|-------------------|------------|---------------------|------------|
| Mn(2)-O(2)#2      | 2.1118     | O(2)-Mn(2)-N(3)     | 89.5       |
| Mn(2)-O(2)        | 2.1118     | O(2)#2-Mn(2)-N(3)#2 | 89.5       |
| Mn(2)-N(3)        | 2.2438     | O(2)-Mn(2)-N(3)#2   | 90.5       |
| Mn(2)-N(3)#2      | 2.2438     | N(3)-Mn(2)-N(3)#2   | 180        |
| Mn(2)-O(9)#2      | 2.3228     | O(2)#2-Mn(2)-O(9)#2 | 96.2       |
| Mn(2)-O(9)        | 2.3228     | O(2)-Mn(2)-O(9)#2   | 83.8       |
| O(3)-Mn(1)#5      | 2.3301     | N(3)-Mn(2)-O(9)#2   | 86.7       |
| O(4)-Mn(1)#5      | 2.2643     | N(3)#2-Mn(2)-O(9)#2 | 93.3       |
| O(6)-Mn(1)-O(8)   | 88.2       | O(2)#2-Mn(2)-O(9)   | 83.8       |
| O(6)-Mn(1)-N(1)   | 126.3      | O(2)-Mn(2)-O(9)     | 96.2       |
| O(8)-Mn(1)-N(1)   | 84.8       | N(3)-Mn(2)-O(9)     | 93.3       |
| O(6)-Mn(1)-O(7)   | 93.6       | N(3)#2-Mn(2)-O(9)   | 86.7       |
| O(8)-Mn(1)-O(7)   | 175.2      | O(9)#2-Mn(2)-O(9)   | 180        |
| N(1)-Mn(1)-O(7)   | 90.5       | C(18)-N(1)-Mn(1)    | 126.67(19) |
| O(6)-Mn(1)-O(4)#1 | 145.4      | C(16)-N(1)-Mn(1)    | 127.93(18) |
| O(8)-Mn(1)-O(4)#1 | 94.9       | C(1)-O(2)-Mn(2)     | 168.56(18) |
| N(1)-Mn(1)-O(4)#1 | 88.3       | C(11)-O(3)-Mn(1)#5  | 90.09(19)  |
| O(7)-Mn(1)-O(4)#1 | 86.2       | C(11)-O(4)-Mn(1)#5  | 93.28(19)  |
| O(6)-Mn(1)-O(3)#1 | 89.1       | C(14)-O(6)-Mn(1)    | 113.88(18) |
| <hr/>             |            |                     |            |
| Compound 3        |            |                     |            |
| Ni(1)-O(1)        | 2.030(4)   | O(1)-Ni(1)-O(7)     | 88.42(15)  |
| Ni(1)-N(4)#1      | 2.066(5)   | N(4)#1-Ni(1)-O(7)   | 88.58(17)  |
| Ni(1)-N(1)        | 2.065(4)   | N(1)-Ni(1)-O(7)     | 176.20(17) |
| Ni(1)-O(8)        | 2.074(4)   | O(8)-Ni(1)-O(7)     | 85.65(15)  |
| Ni(1)-O(7)        | 2.104(4)   | O(1)-Ni(1)-O(9)     | 175.86(17) |
| Ni(1)-O(9)        | 2.106(4)   | N(4)#1-Ni(1)-O(9)   | 93.55(18)  |
| N(4)-Ni(1)#2      | 2.066(5)   | N(1)-Ni(1)-O(9)     | 89.64(17)  |
| O(1)-Ni(1)-N(4)#1 | 87.49(16)  | O(8)-Ni(1)-O(9)     | 86.62(17)  |
| O(1)-Ni(1)-N(1)   | 94.28(17)  | O(7)-Ni(1)-O(9)     | 87.60(16)  |
| N(4)#1-Ni(1)-N(1) | 94.20(18)  | C(18)-N(1)-Ni(1)    | 127.2(4)   |
| O(1)-Ni(1)-O(8)   | 91.94(15)  | C(16)-N(1)-Ni(1)    | 127.3(4)   |
| N(4)#1-Ni(1)-O(8) | 174.21(17) | C(25)-N(4)-Ni(1)#2  | 131.9(4)   |
| N(1)-Ni(1)-O(8)   | 91.59(16)  | C(26)-N(4)-Ni(1)#2  | 123.5(4)   |
|                   |            | C(1)-O(1)-Ni(1)     | 132.8(4)   |
| <hr/>             |            |                     |            |
| Compound 4        |            |                     |            |
| Ni(1)-N(4)        | 2.053(7)   | O(5)-Ni(1)-O(4)#1   | 90.5(2)    |
| Ni(1)-N(4)#1      | 2.053(7)   | O(5)#1-Ni(1)-O(4)#1 | 89.5(2)    |
| Ni(1)-O(5)        | 2.069(6)   | O(4)-Ni(1)-O(4)#1   | 179.999(1) |
| Ni(1)-O(5)#1      | 2.069(6)   | N(7)#2-Ni(2)-O(1)   | 86.5(3)    |
| Ni(1)-O(4)        | 2.082(5)   | N(7)#2-Ni(2)-N(2)   | 91.0(3)    |
| Ni(1)-O(4)#1      | 2.082(5)   | O(1)-Ni(2)-N(2)     | 90.0(3)    |
| Ni(2)-N(7)#2      | 2.054(7)   | N(7)#2-Ni(2)-N(5)   | 176.7(3)   |
| Ni(2)-O(1)        | 2.079(6)   | O(1)-Ni(2)-N(5)     | 93.7(3)    |
| Ni(2)-N(2)        | 2.079(7)   | N(2)-Ni(2)-N(5)     | 92.2(3)    |

## Supplementary Information

|                     |            |                    |          |
|---------------------|------------|--------------------|----------|
| Ni(2)-N(5)          | 2.084(7)   | N(7)#2-Ni(2)-O(3)  | 88.1(3)  |
| Ni(2)-O(3)          | 2.100(6)   | O(1)-Ni(2)-O(3)    | 172.5(2) |
| Ni(2)-O(2)          | 2.109(6)   | N(2)-Ni(2)-O(3)    | 95.3(3)  |
| N(7)-Ni(2)#3        | 2.054(7)   | N(5)-Ni(2)-O(3)    | 91.4(3)  |
| N(4)-Ni(1)-N(4)#1   | 179.997(2) | N(7)#2-Ni(2)-O(2)  | 89.4(3)  |
| N(4)-Ni(1)-O(5)     | 89.8(3)    | O(1)-Ni(2)-O(2)    | 88.3(2)  |
| N(4)#1-Ni(1)-O(5)   | 90.2(3)    | N(2)-Ni(2)-O(2)    | 178.2(3) |
| N(4)-Ni(1)-O(5)#1   | 90.2(3)    | N(5)-Ni(2)-O(2)    | 87.4(3)  |
| N(4)#1-Ni(1)-O(5)#1 | 89.8(3)    | O(3)-Ni(2)-O(2)    | 86.5(2)  |
| O(5)-Ni(1)-O(5)#1   | 179.999(2) | C(3)-N(2)-Ni(2)    | 124.2(6) |
| N(4)-Ni(1)-O(4)     | 90.4(3)    | C(1)-N(2)-Ni(2)    | 130.9(6) |
| N(4)#1-Ni(1)-O(4)   | 89.6(3)    | C(12)-N(4)-Ni(1)   | 127.4(6) |
| O(5)-Ni(1)-O(4)     | 89.5(2)    | C(11)-N(4)-Ni(1)   | 127.8(6) |
| O(5)#1-Ni(1)-O(4)   | 90.5(2)    | C(15)-N(5)-Ni(2)   | 128.7(6) |
| N(4)-Ni(1)-O(4)#1   | 89.6(3)    | C(13)-N(5)-Ni(2)   | 127.1(6) |
| N(4)#1-Ni(1)-O(4)#1 | 90.4(3)    | C(24)-N(7)-Ni(2)#3 | 129.7(6) |
| C(23)-N(7)-Ni(2)#3  | 124.1(6)   |                    |          |

Symmetry Codes: **Compound 1:** #1 = -x, -y, -z + 1; #2 = -x, -y + 2, -z + 2; #3 = -x + 1, -y + 2, -z + 2; #4 = x, y - 1, z; #5 = -x - 1, -y - 1, -z + 1; #6 = x, y + 1, z.

**Compound 2:** #1 = x - 1, y, z; #2 = -x, -y + 2, -z; #3 = -x - 1, -y + 3, -z; #4 = -x, -y, -z + 1; #5 = x + 1, y, z.

**Compound 3:** #1 = -x + 5/2, -y + 1, z + 1/2; #2 = -x + 5/2, -y + 1, z - 1/2.

**Compound 4:** #1 = -x, -y + 1, -z + 2; #2 = x - 1, y, z; #3 = x + 1, y, z.

**Table S3 Hydrogen bond distances and bond angles (Å, °) for 3**

| Donor-H...Acceptor | D - H | H...A | D...A    | D - H...A |
|--------------------|-------|-------|----------|-----------|
| O(3)-H(3)...O(6)   | 0.82  | 1.88  | 2.661(5) | 160       |
| O(7)-H(7B)...O(5)  | 0.85  | 1.88  | 2.726(5) | 173       |
| O(8)-H(8A)...O(2)  | 0.82  | 1.99  | 2.718(5) | 148       |
| O(8)-H(8B)...O(6)  | 0.85  | 1.86  | 2.709(5) | 179       |
| O(9)-H(9A)...O(5)  | 0.82  | 1.98  | 2.793(6) | 172       |
| O(9)-H(9B)...O(2)  | 0.85  | 2.15  | 2.999(6) | 174       |

**Hydrogen bond distances and bond angles (Å, °) for 4**

| Donor-H...Acceptor | D - H | H...A | D...A    | D - H...A |
|--------------------|-------|-------|----------|-----------|
| O(1)-H(1A)...O(6)  | 0.82  | 2.03  | 2.694(8) | 138       |
| O(1)-H(1B)...O(9)  | 0.82  | 1.88  | 2.651(9) | 157       |

## Supplementary Information

|                    |      |      |           |     |
|--------------------|------|------|-----------|-----|
| O(2)–H(2A)···O(4W) | 0.82 | 2.07 | 2.795(11) | 147 |
| O(3)–H(3A)···O(6)  | 0.82 | 2.05 | 2.769(8)  | 146 |
| O(3)–H(3B)···O(2)  | 1.07 | 2.21 | 2.882(8)  | 119 |
| O(4)–H(4A)···O(10) | 0.82 | 1.94 | 2.747(8)  | 168 |
| O(5)–H(5A)···O(6)  | 0.82 | 2.30 | 2.710(7)  | 111 |
| O(5)–H(5B)···O(4)  | 0.85 | 2.57 | 2.922(7)  | 106 |
| O(5)–H(5B)···O(10) | 0.85 | 1.89 | 2.743(8)  | 179 |

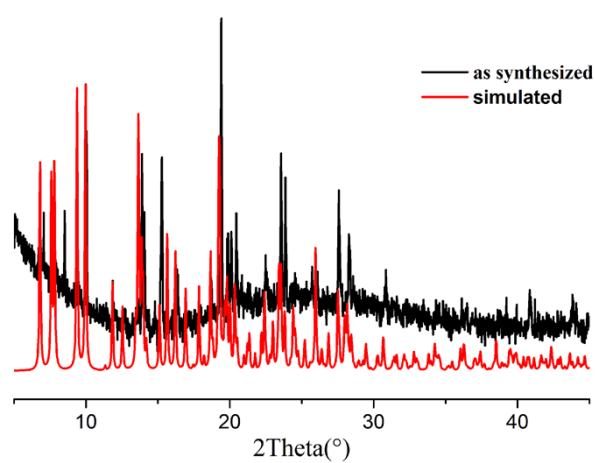

Figure S1. The Powder X-ray diffraction (PXRD) patterns of **1**.

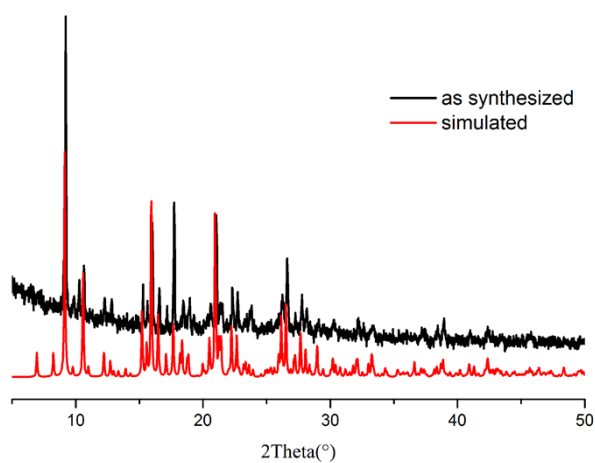

Figure S2. The Powder X-ray diffraction (PXRD) patterns of **2**.

## Supplementary Information

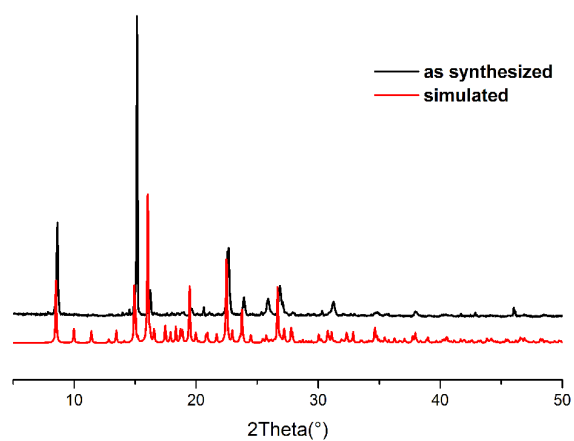

Figure S3. The Powder X-ray diffraction (PXRD) patterns of **3**.

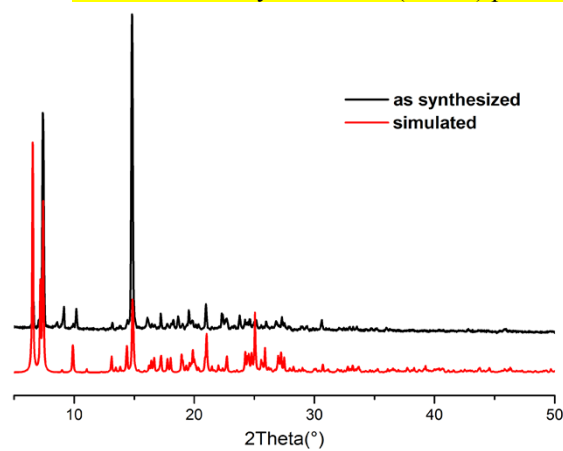

Figure S4. The Powder X-ray diffraction (PXRD) patterns of **4**.

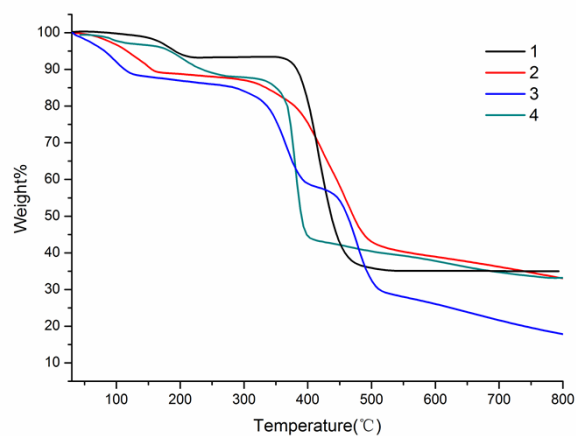

Figure S5. The TGA analyses of the compound **1 – 4**.

*Supplementary Information*

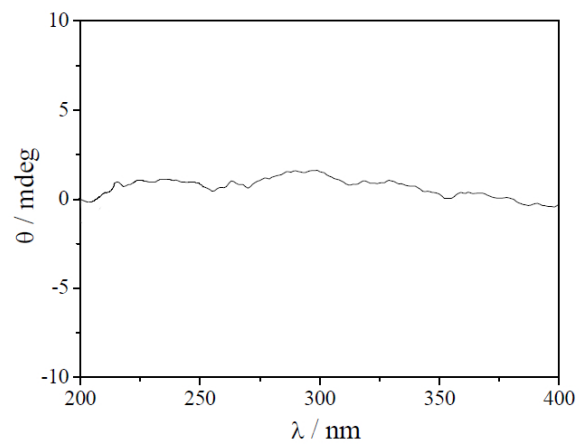

Figure S6. Solid-state CD spectra of bulk sample of compound **3** at room temperature.
